# Supplementary material for: APOL4, a Novel Immune-Related Prognostic Biomarker for Glioma
Source: MDPI journal article supplement (doi:10.3390/jcm11195765), 2022-09-29
Supplement: s1 [file s1]

**Table S1.** Full names and abbreviations of 33 types of cancer.

|                                  |        |
|----------------------------------|--------|
| Acute Myeloid Leukemia           | (LAML) |
| Adrenocortical Cancer            | (ACC)  |
| Bile Duct Cancer                 | (CHOL) |
| Bladder Cancer                   | (BLCA) |
| Breast Cancer                    | (BRCA) |
| Cervical Cancer                  | (CESC) |
| Colon Cancer                     | (COAD) |
| Endometrioid Cancer              | (UCEC) |
| Esophageal Cancer                | (ESCA) |
| Glioblastoma                     | (GBM)  |
| Head and Neck Cancer             | (HNSC) |
| Kidney Chromophobe               | (KICH) |
| Kidney Clear Cell Carcinoma      | (KIRC) |
| Kidney Papillary Cell Carcinoma  | (KIRP) |
| Large B-cell Lymphoma            | (DLBC) |
| Liver Cancer                     | (LIHC) |
| Lower Grade Glioma               | (LGG)  |
| Lung Adenocarcinoma              | (LUAD) |
| Lung Squamous Cell Carcinoma     | (LUSC) |
| Melanoma                         | (SKCM) |
| Mesothelioma                     | (MESO) |
| Ocular melanomas                 | (UVM)  |
| Ovarian Cancer                   | (OV)   |
| Pancreatic Cancer                | (PAAD) |
| Pheochromocytoma & Paraganglioma | (PCPG) |
| Prostate Cancer                  | (PRAD) |
| Rectal Cancer                    | (READ) |
| Sarcoma                          | (SARC) |
| Stomach Cancer                   | (STAD) |
| Testicular Cancer                | (TGCT) |
| Thymoma                          | (THYM) |
| Thyroid Cancer                   | (THCA) |
| Uterine Carcinosarcoma           | (UCS)  |
