# Supplementary figures and images for: APOL4, a Novel Immune-Related Prognostic Biomarker for Glioma
Source: MDPI journal article supplement (doi:10.3390/jcm11195765), 2022-09-29

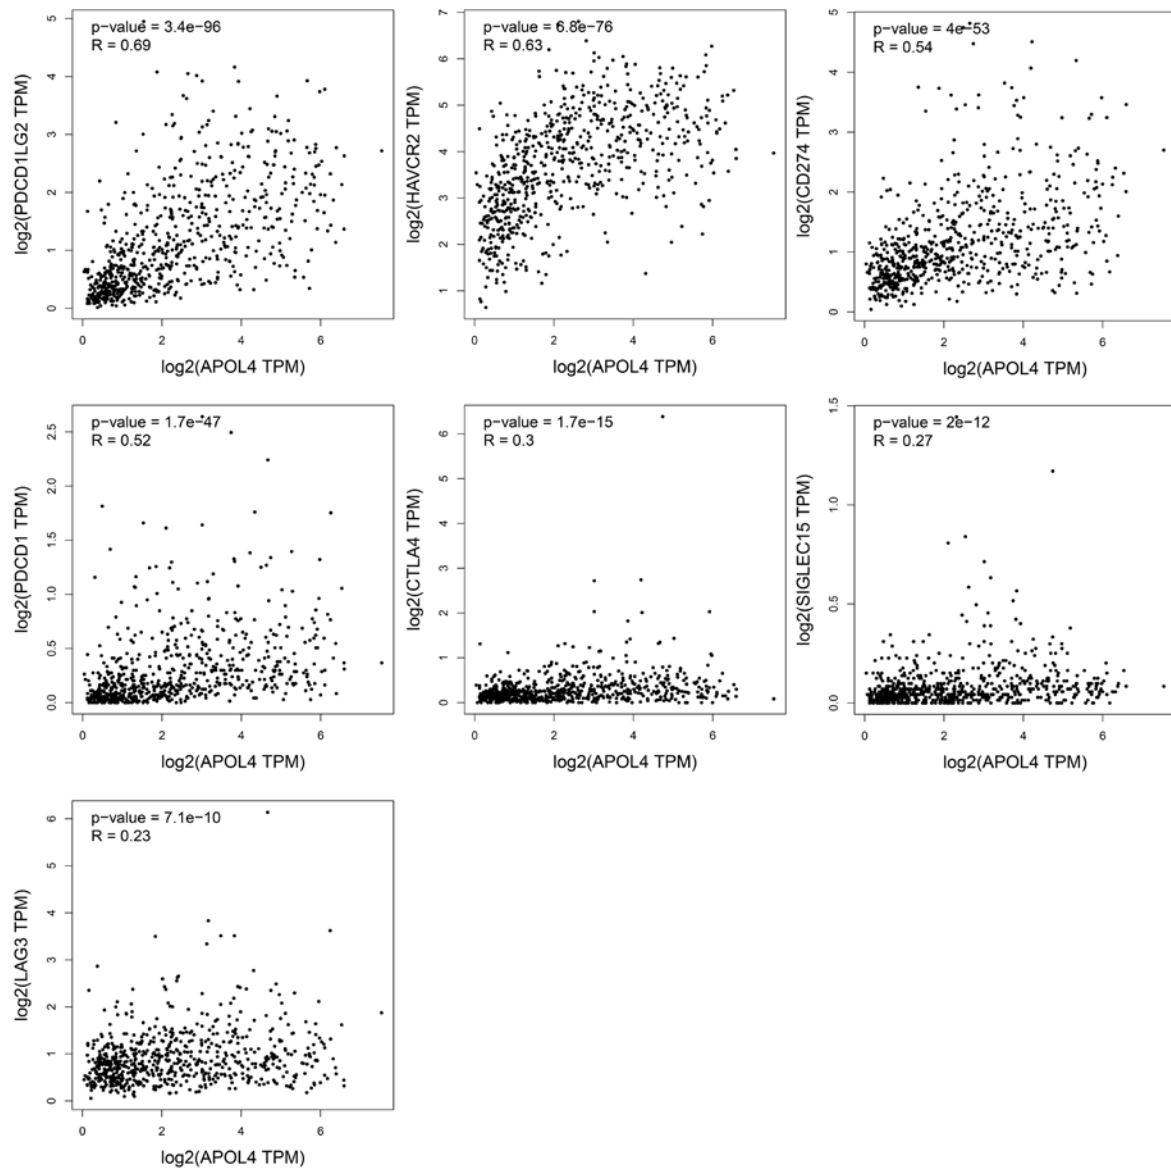

**Figure S1.** Correlation of APOL4 with immune checkpoints in GEPIA.

Supplement: s1 [file s1]
